# Supplementary material for: Facile synthesis of biocompatible MoSe2 nanoparticles for efficient targeted photothermal therapy of human lung cancer
Source: Royal Society of Chemistry journal article supplement (doi:10.1039/c6ra27384j), 2017-01-01
Supplement: c6ra27384j1.pdf [file c6ra27384j1.pdf]

## Supplementary information

### **Facile synthesis of biocompatible MoSe<sub>2</sub> nanoparticles for efficient targeted photothermal therapy of human lung cancer**

Chunlei Zhong <sup>a\*</sup>, Xin Zhao <sup>a</sup>, Lijiang Wang <sup>a</sup>, Yunxia Li <sup>a</sup>, and Yingying Zhao <sup>a</sup>

<sup>a</sup> The Second Department of Respiratory Medicine, the First Affiliated Hospital of Xinxiang Medical University, Weihui 453100, China.

\*Correspondence: Chunlei Zhong

E-mail: zhongclei@163.com

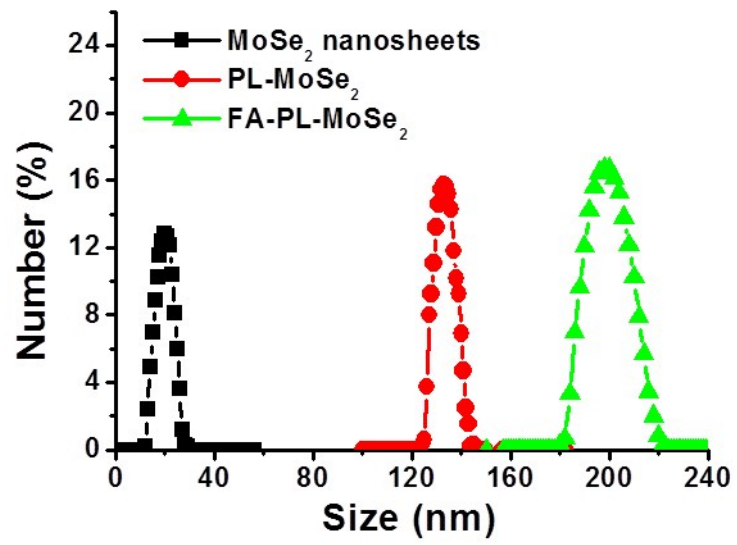

Fig. S1 The size distribution of MoSe<sub>2</sub> nanosheets, PL-MoSe<sub>2</sub> and FA-PL-MoSe<sub>2</sub>.

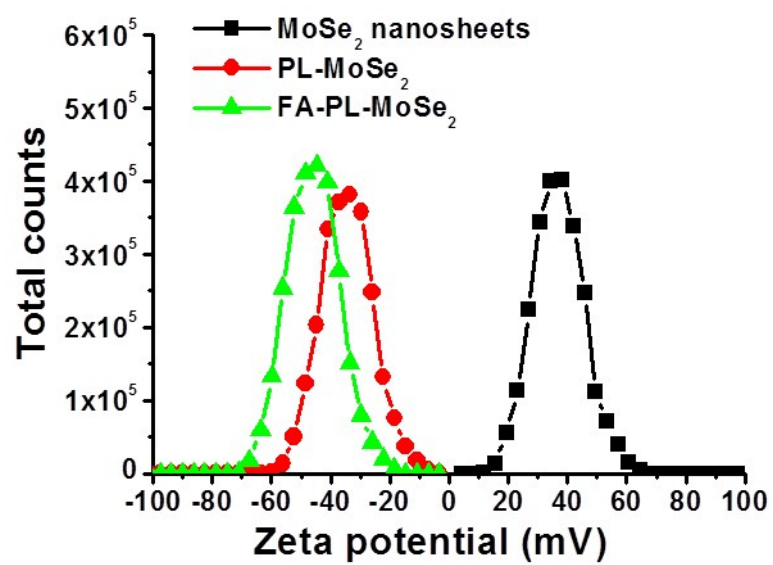

**Fig. S2** The zeta potential distribution of MoSe<sub>2</sub> nanosheets, PL-MoSe<sub>2</sub> and FA-PL-MoSe<sub>2</sub>.
